# Supplementary material for: In situ synthesized Au–Ag nanocages on graphene oxide nanosheets: a highly active and recyclable catalyst for the reduction of 4-nitrophenol
Source: Royal Society of Chemistry journal article supplement (doi:10.1039/c5nj02978c), 2015-12-02
Supplement: c5nj02978c1.pdf [file c5nj02978c1.pdf]

## Electronic Supplementary Information

### ***In Situ* synthesized Au–Ag nanocages on graphene oxide nanosheets: a highly active and recyclable catalyst for the reduction of 4-nitrophenol**

Min Hong,<sup>\*a,b</sup> Lidan Xu,<sup>a</sup> Fangli Wang,<sup>a</sup> Shuling Xu,<sup>a</sup> Haibo Li,<sup>a</sup> Chenzhong Li,<sup>a</sup> and  
Jifeng Liu<sup>\*a</sup>

<sup>a</sup> Shandong Provincial Key Laboratory of Chemical Energy Storage and Novel Cell Technology, School of Chemistry and Chemical Engineering, Liaocheng University, Liaocheng, 252059, China

<sup>b</sup> College of Chemistry, Chemical Engineering and Materials Science, Engineering Research Center of Pesticide and Medicine Intermediate Clean Production, Ministry of Education, Key Laboratory of Molecular and Nano Probes, Ministry of Education, Shandong Normal University, Jinan 250014, Republic of China.

---

\*Corresponding author. Tel.: +866358230662; Fax: +866358239121.  
E-mail address: hongminlcu@163.com (M. Hong); liujifeng111@gmail.com (J.F. Liu).

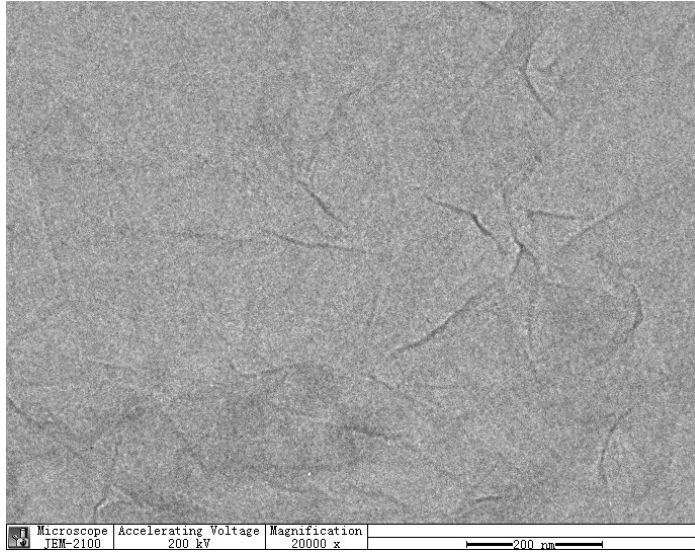

Fig. S1 TEM images of GO.

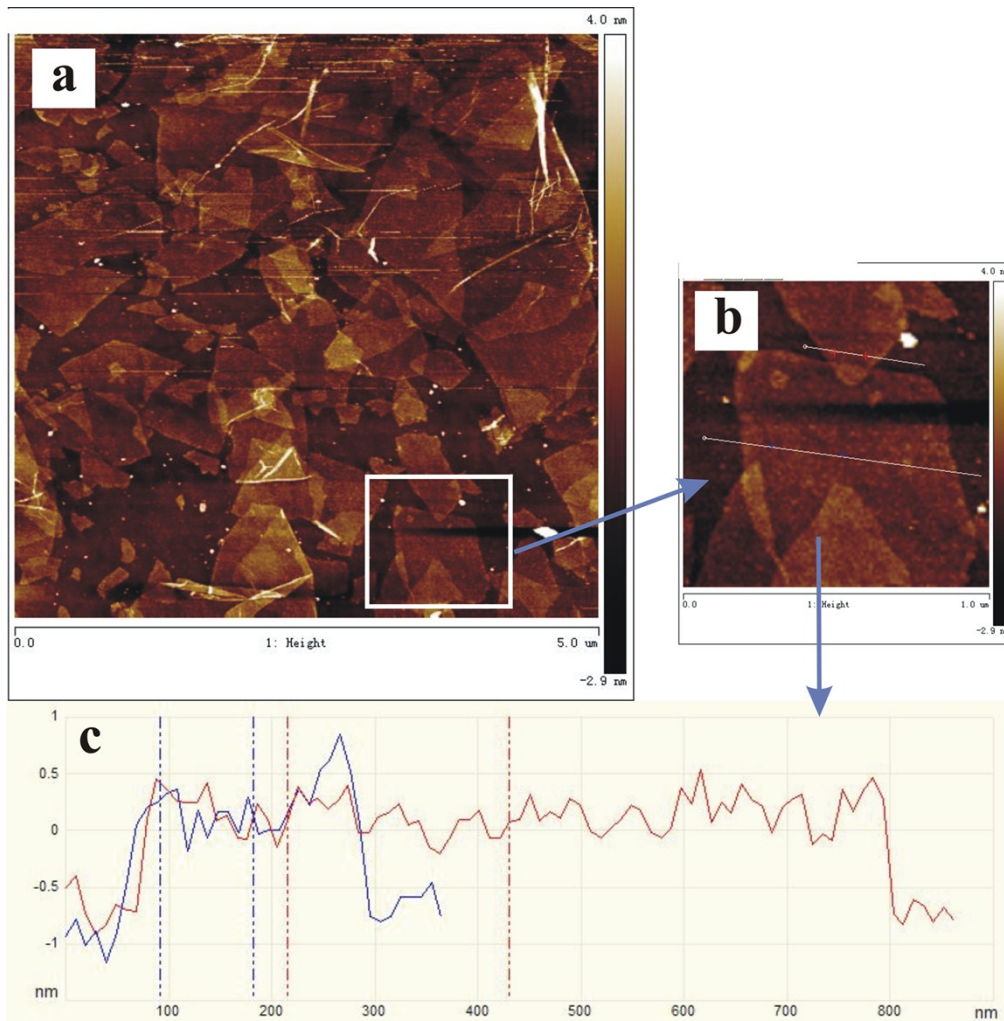

Fig. S2 (a and b) Tapping-mode AFM images of the GO adsorbed on a Si wafer by electrostatic self-assembly. (c) AFM cross section of the line shown in image (b).

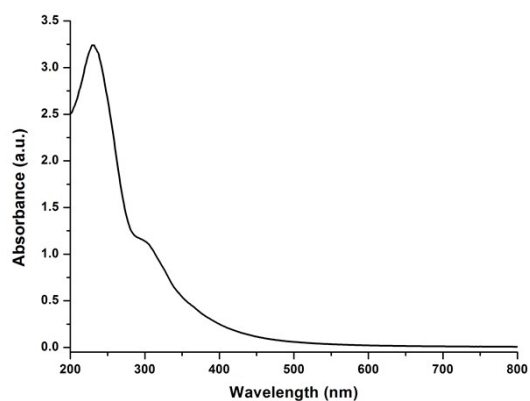

Fig. S3 UV-vis spectrum image of GO.

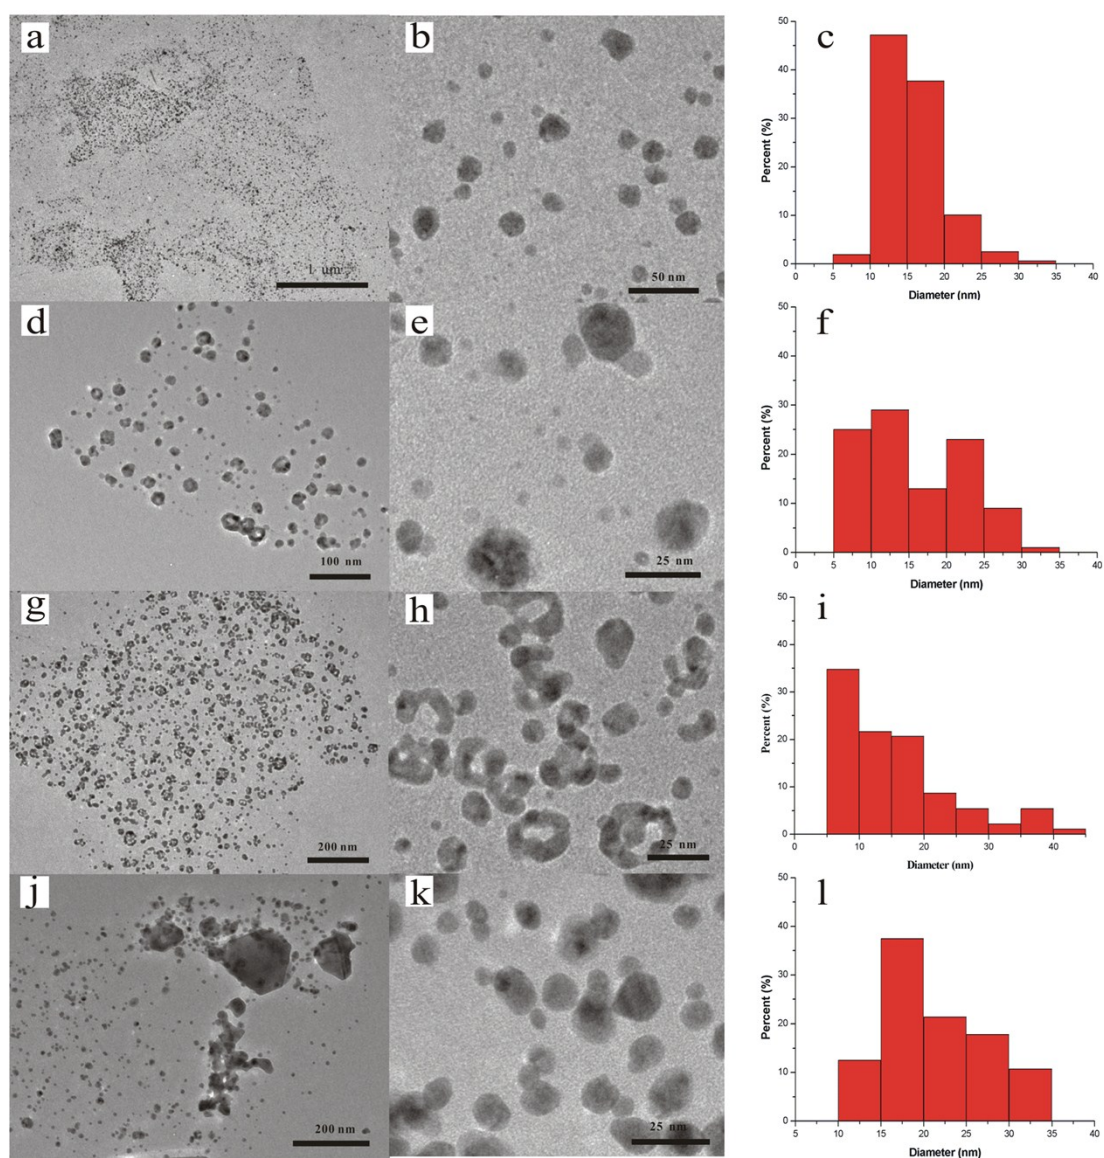

Fig. S4 Typical low- and high-magnification TEM images of the obtained nanoparticle/GO nanocomposites as well as the particle size distribution of the nanoparticles: (a–c) AgNPs/GOs, (d–f) pre-AuAgNC/GO, (g–i) AuAgNC/GO, and (j–l) post-AuAgNC/GO.
